# Supplementary material
Source: PubMed Central journal article supplement (PMC6901116)

Extended Data Fig. 5a

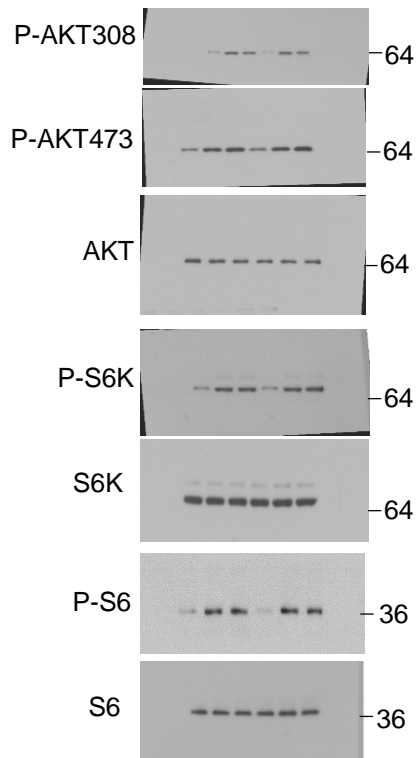

Extended Data Fig. 5b

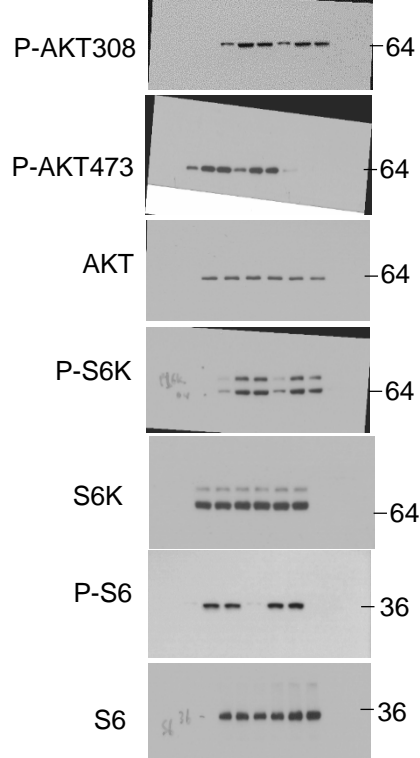

Extended Data Fig. 5c

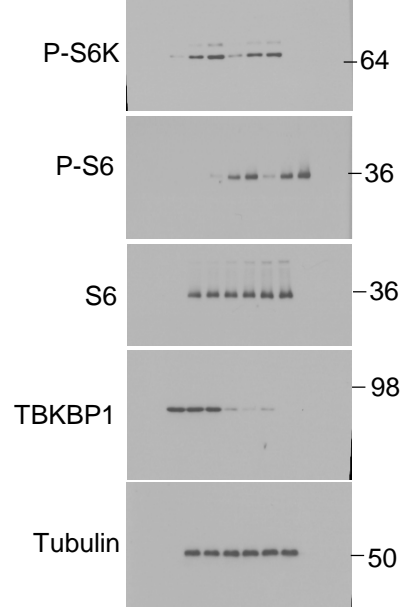

Extended Data Fig. 5d

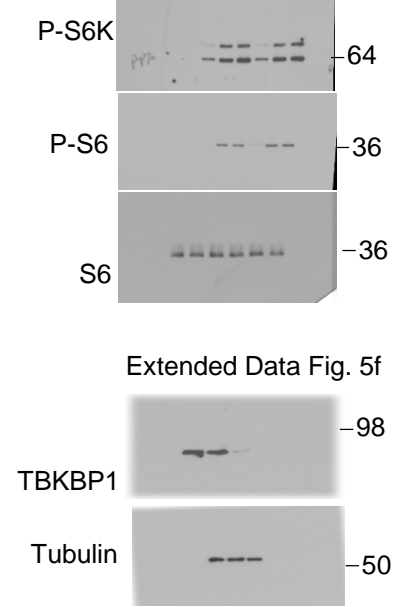

Extended Data Fig. 5f

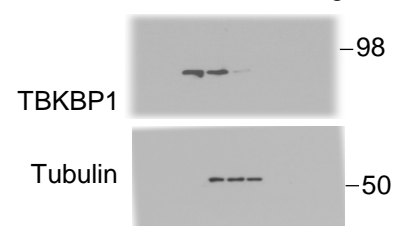

Supplement: NIHMS1541595-supplement-blo_extended_fig5.pdf [file NIHMS1541595-supplement-blo_extended_fig5.pdf]
