# Supplementary material
Source: PubMed Central journal article supplement (PMC6901116)

Extended Data Fig. 6a

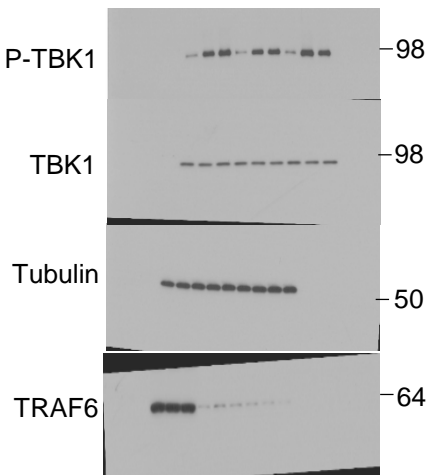

Extended Data Fig. 6c

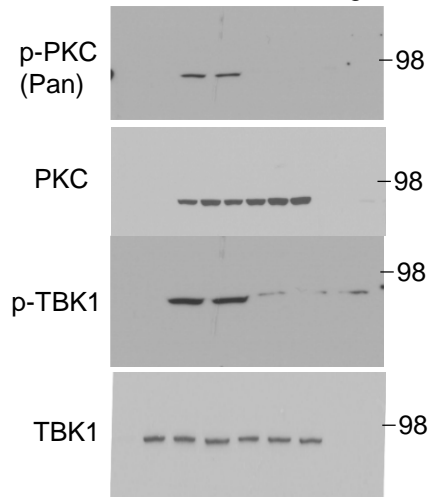

Extended Data Fig. 6d

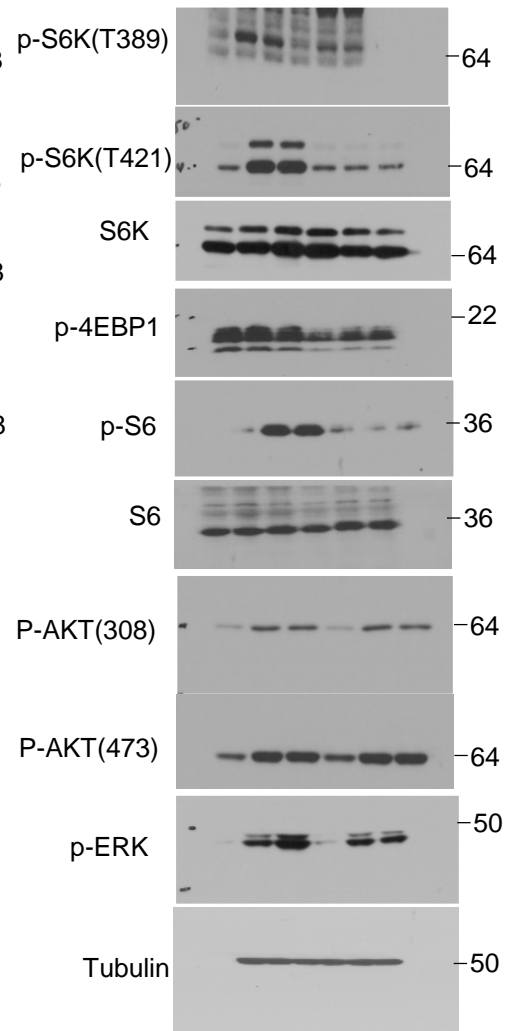

Extended Data Fig. 6e

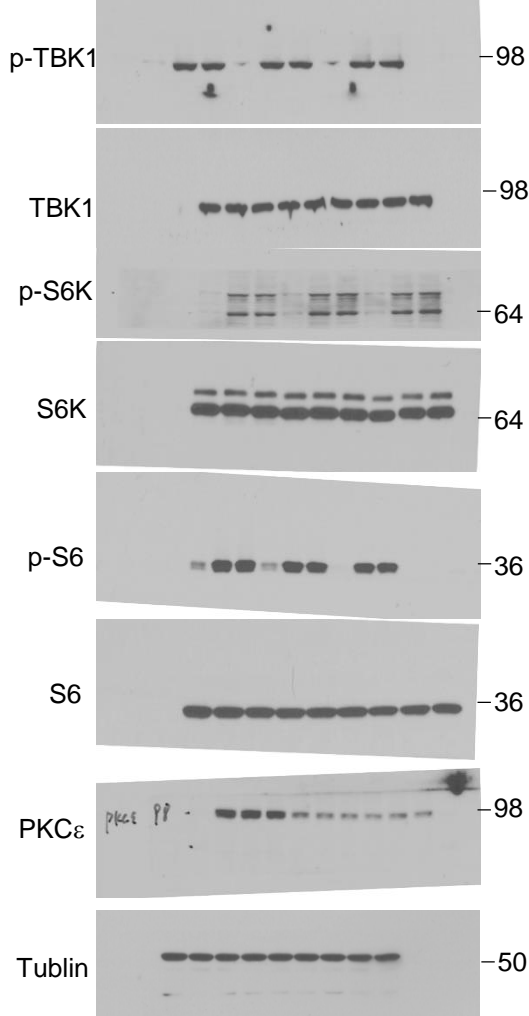

Extended Data Fig. 6b

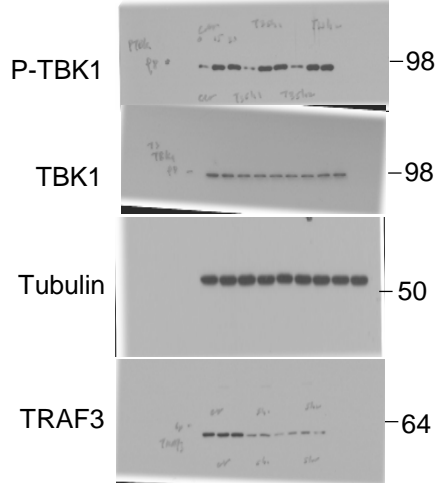

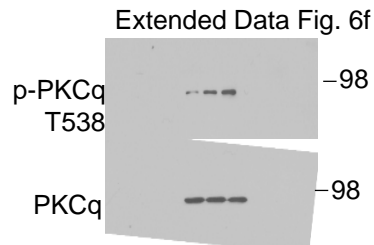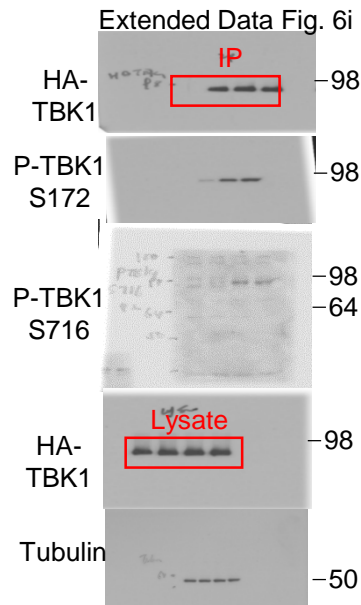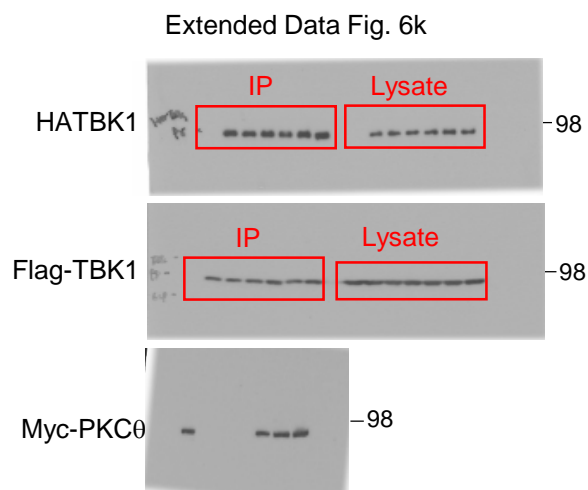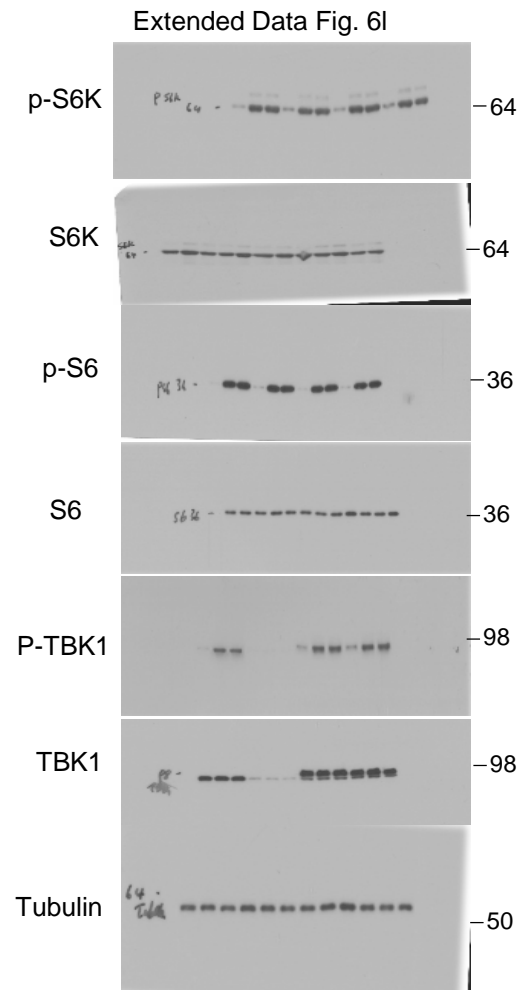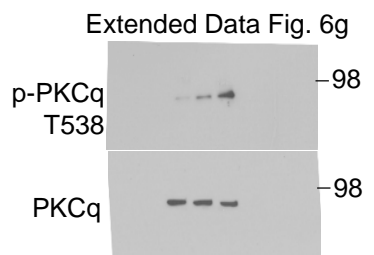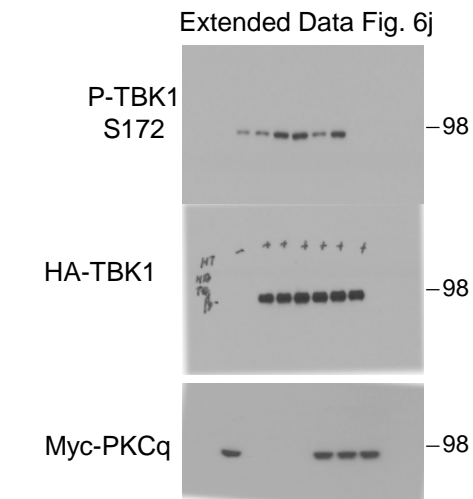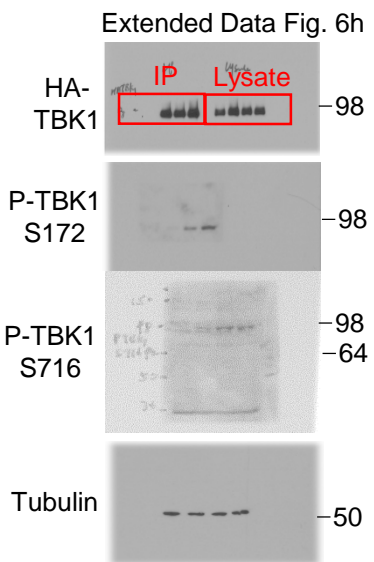

Supplement: NIHMS1541595-supplement-blo_extended_fig6.pdf [file NIHMS1541595-supplement-blo_extended_fig6.pdf]
