# Supplementary material
Source: PubMed Central journal article supplement (PMC6901116)

Extended Data Fig. 1a

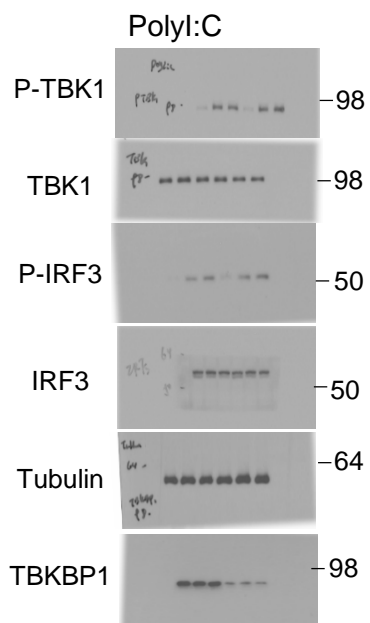

Extended Data Fig. 1a

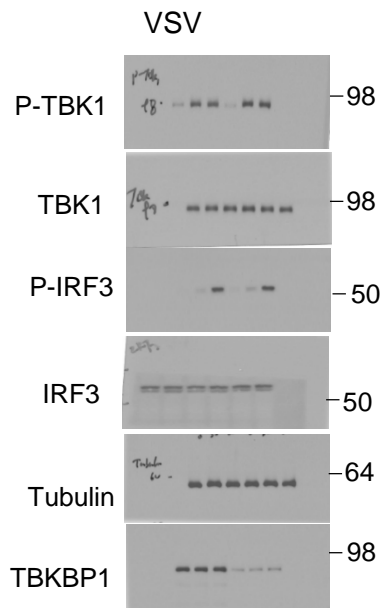

Extended Data Fig. 1a

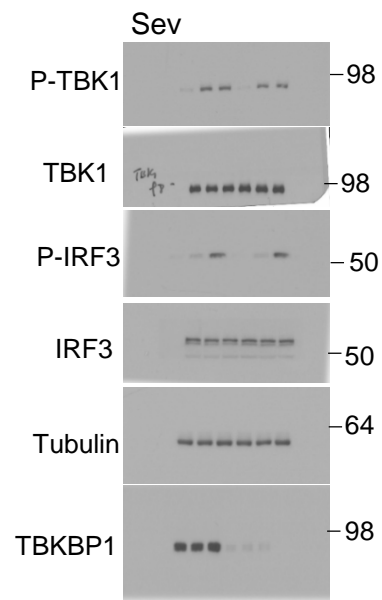

Extended Data Fig. 1a

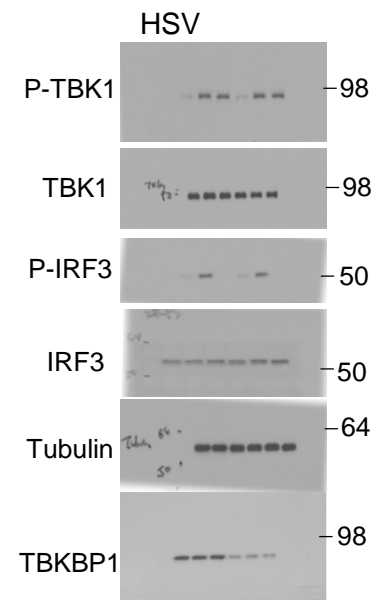

Supplement: NIHMS1541595-supplement-blo_extended_fig1.pdf [file NIHMS1541595-supplement-blo_extended_fig1.pdf]

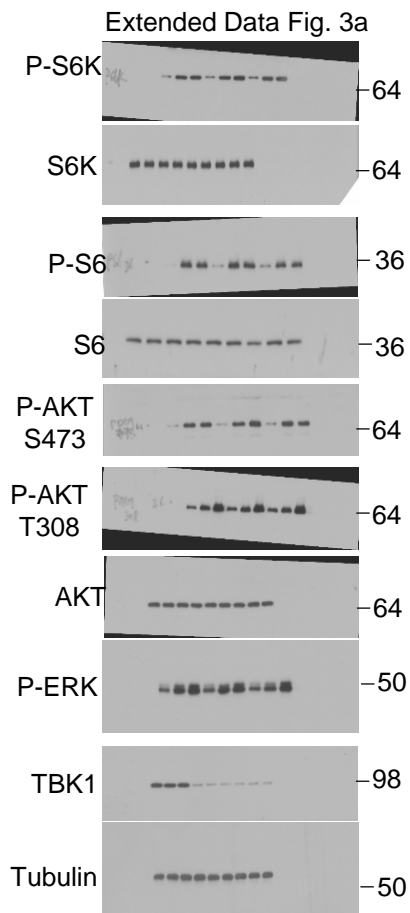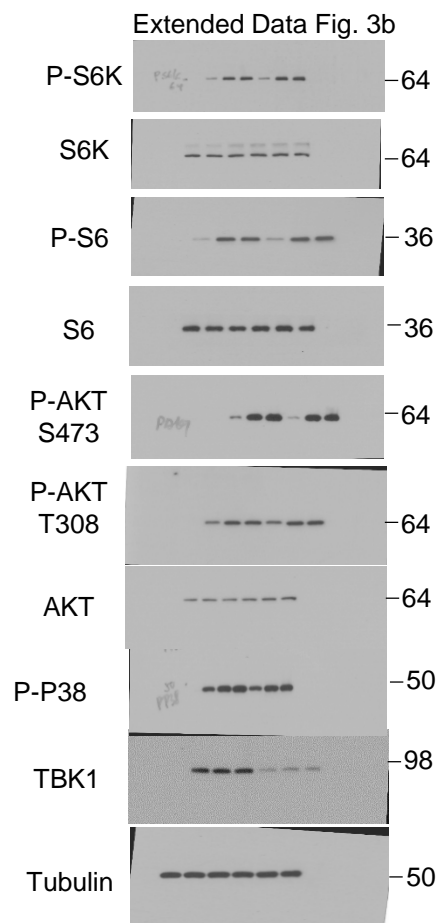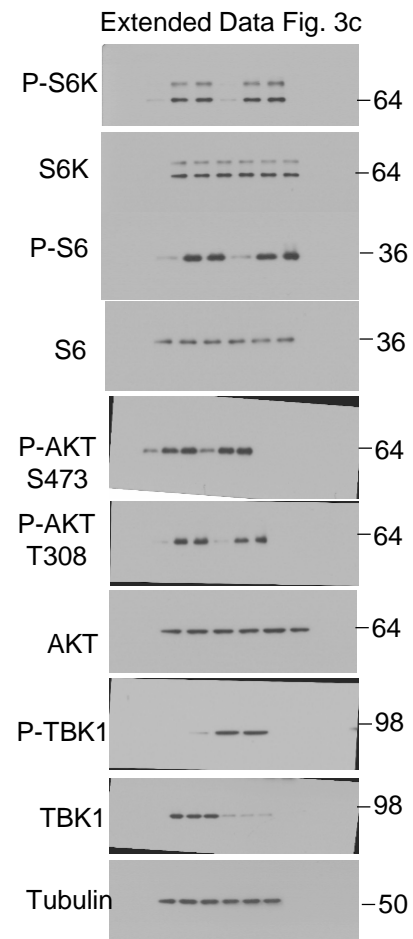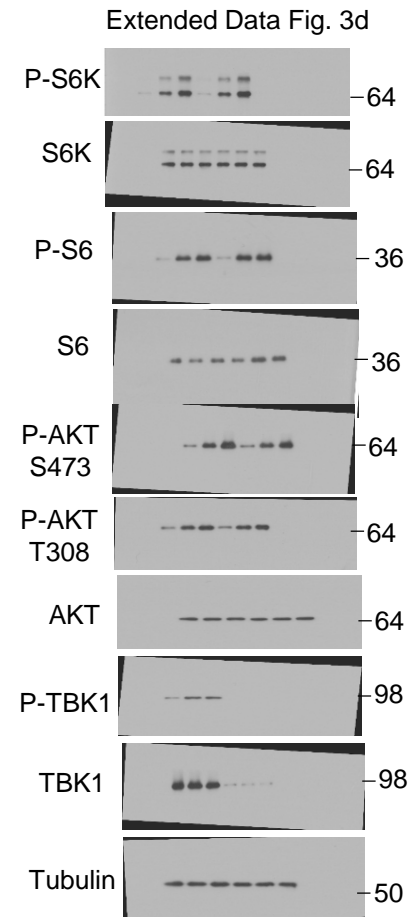

Extended Data Fig. 3e

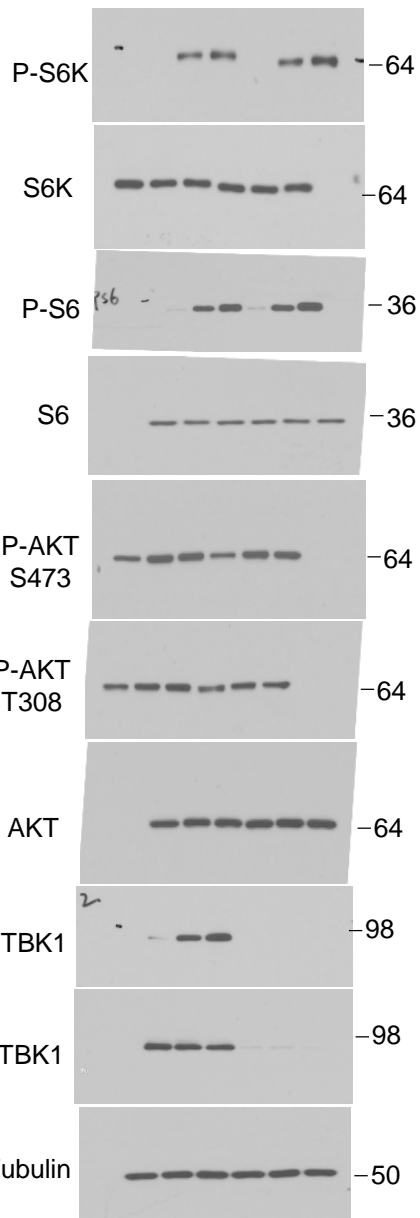

Extended Data Fig. 3f

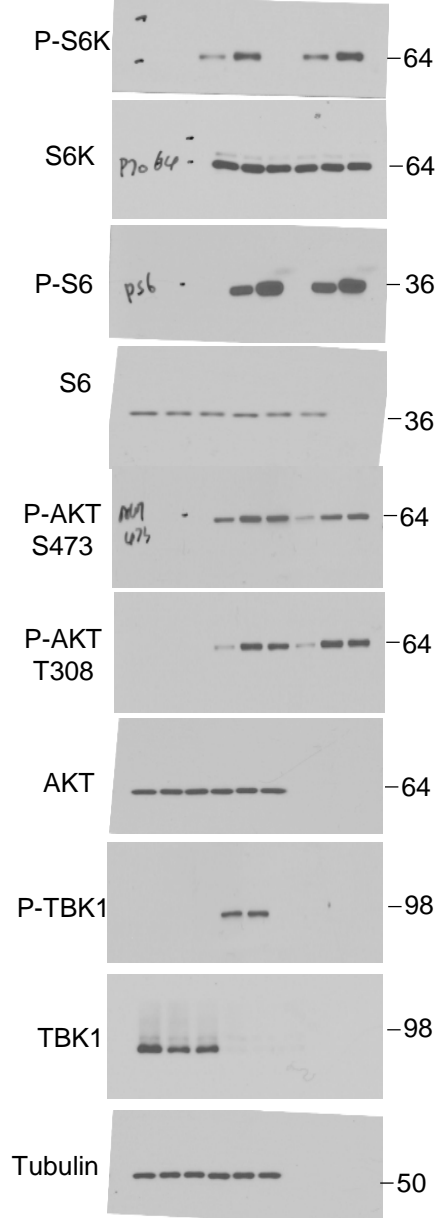

Extended Data Fig. 3g

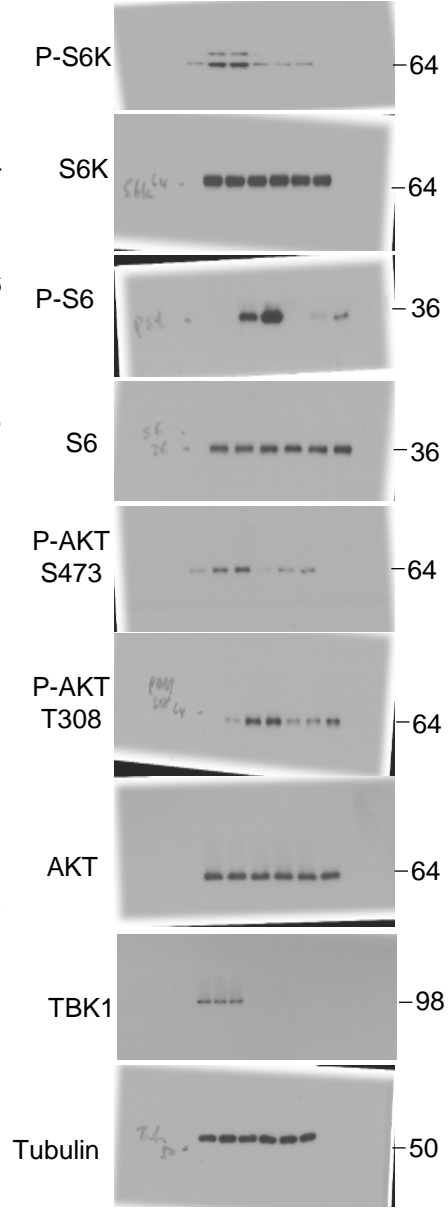

Extended Data Fig. 3h

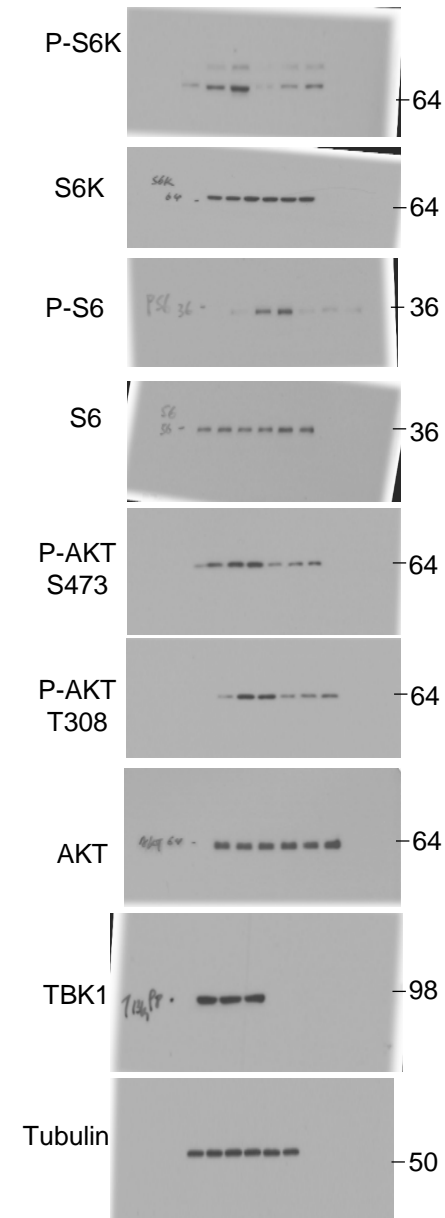

Supplement: NIHMS1541595-supplement-blo_extended_fig3.pdf [file NIHMS1541595-supplement-blo_extended_fig3.pdf]

Fig. 1b

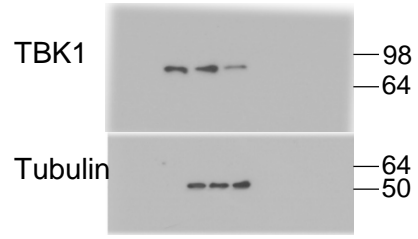

Fig.1h

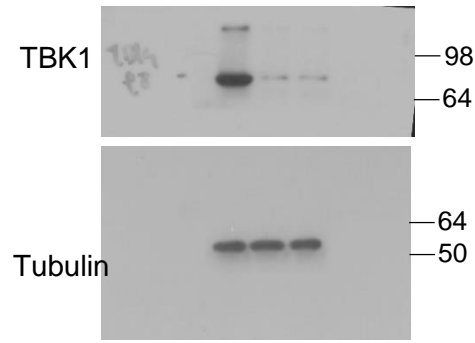

Supplement: NIHMS1541595-supplement-blot_fig1.pdf [file NIHMS1541595-supplement-blot_fig1.pdf]

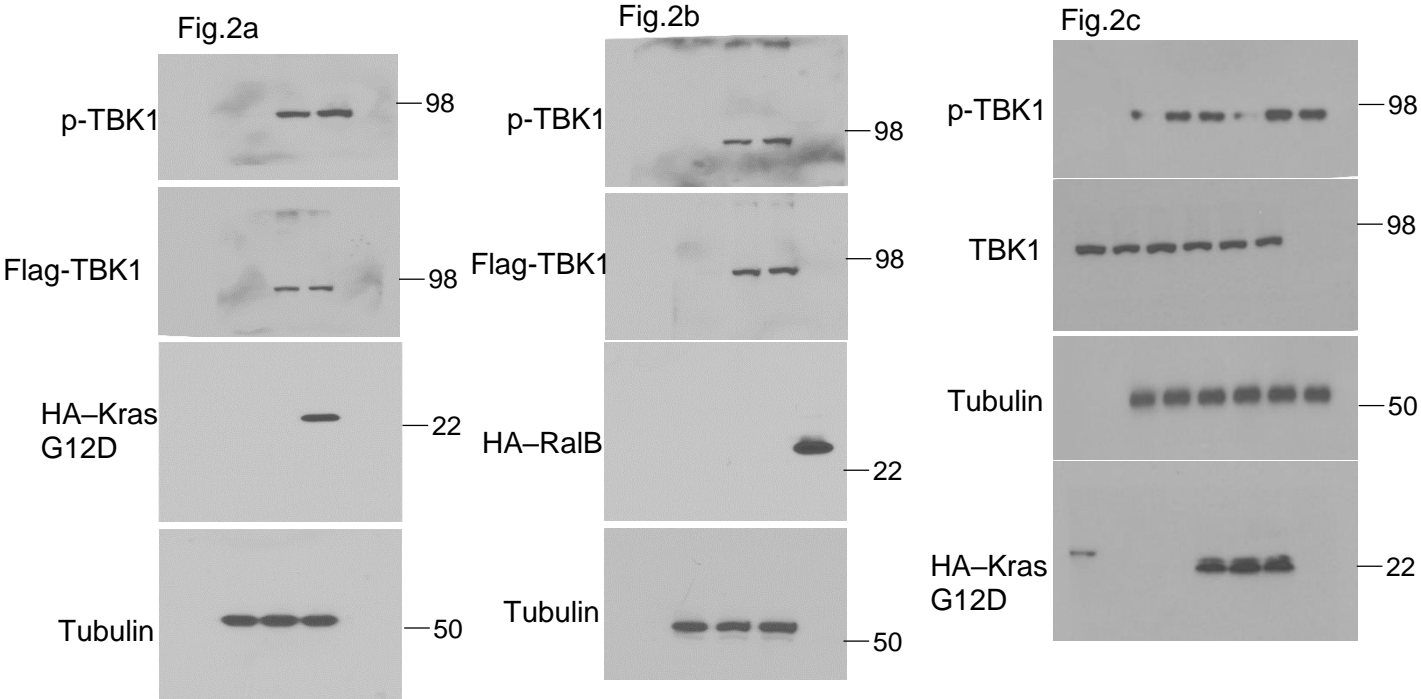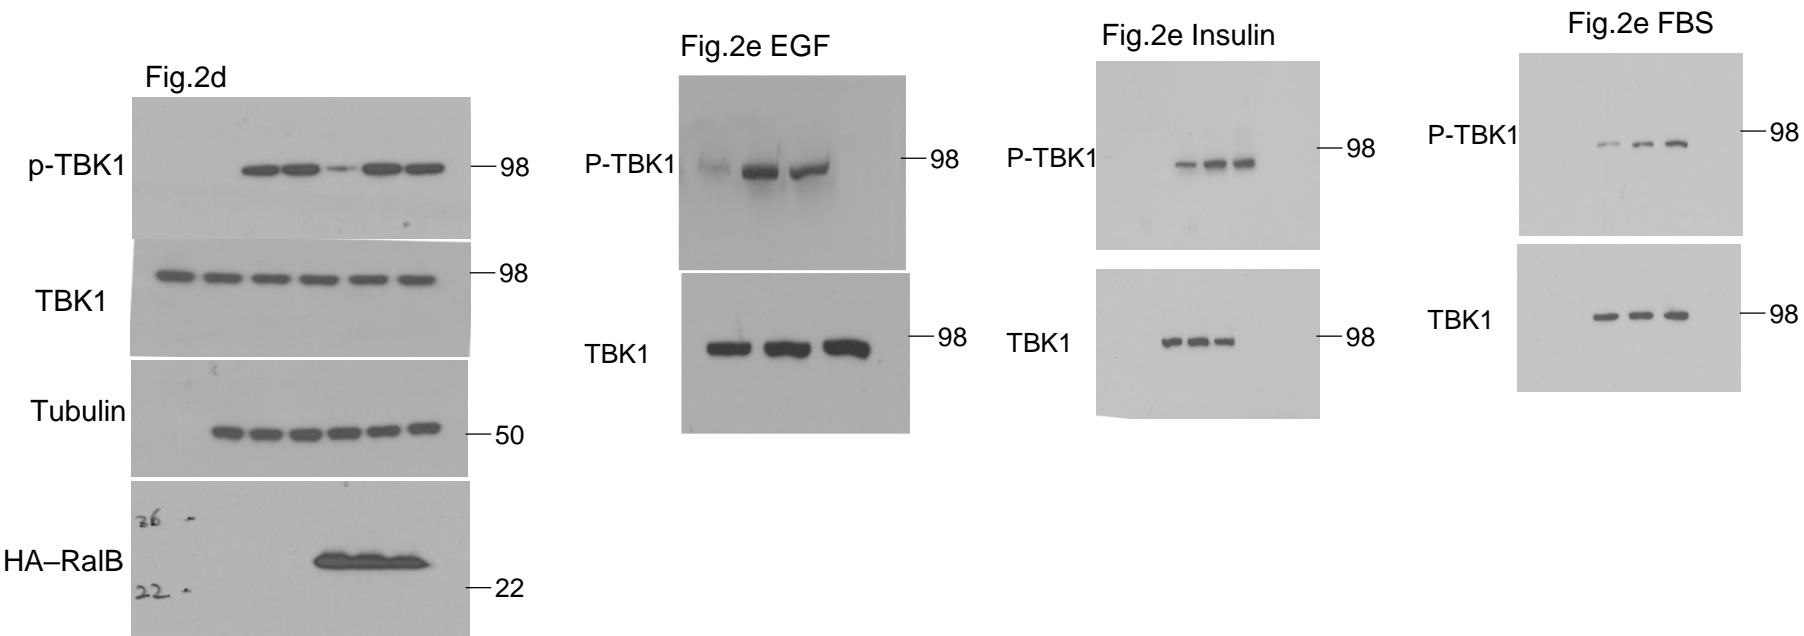

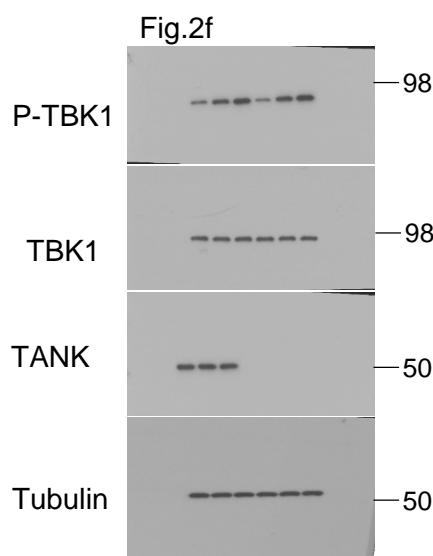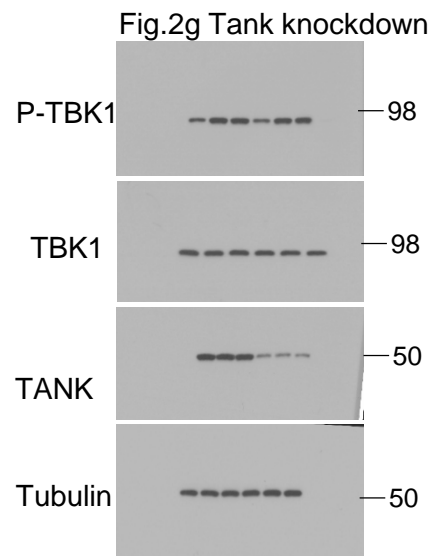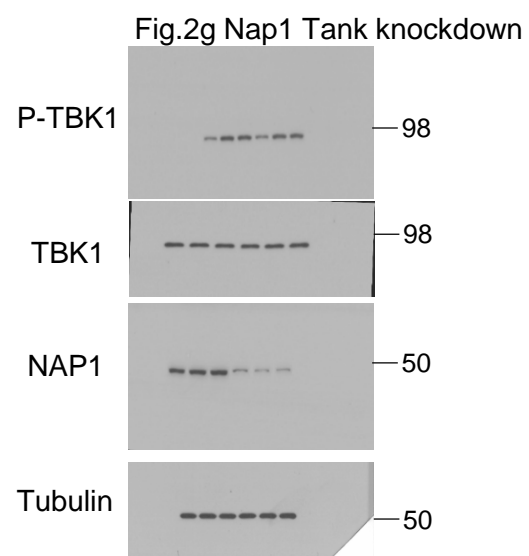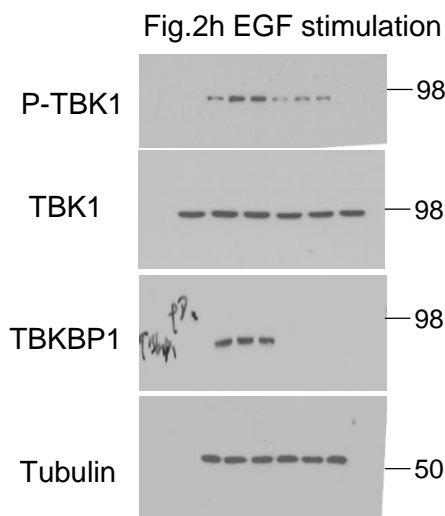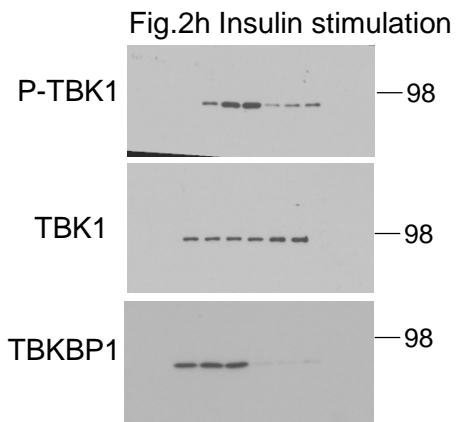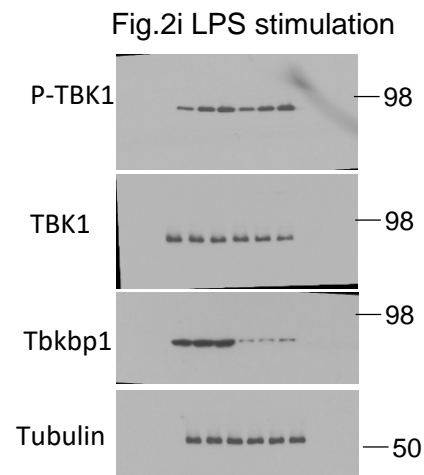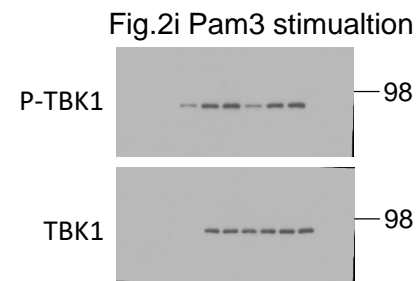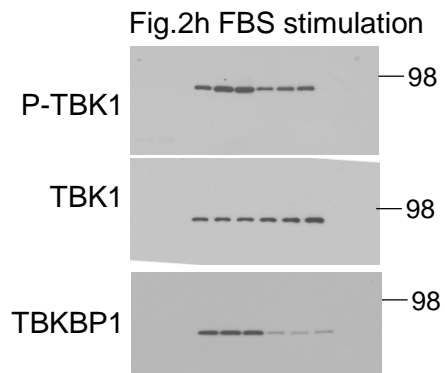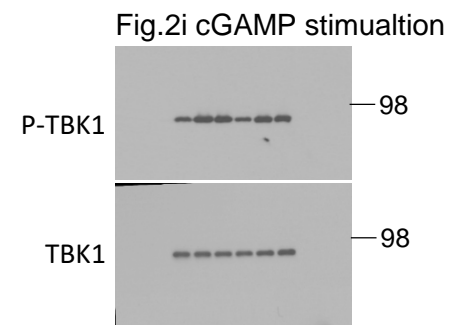

Supplement: NIHMS1541595-supplement-blot_fig2.pdf [file NIHMS1541595-supplement-blot_fig2.pdf]

Fig.3a

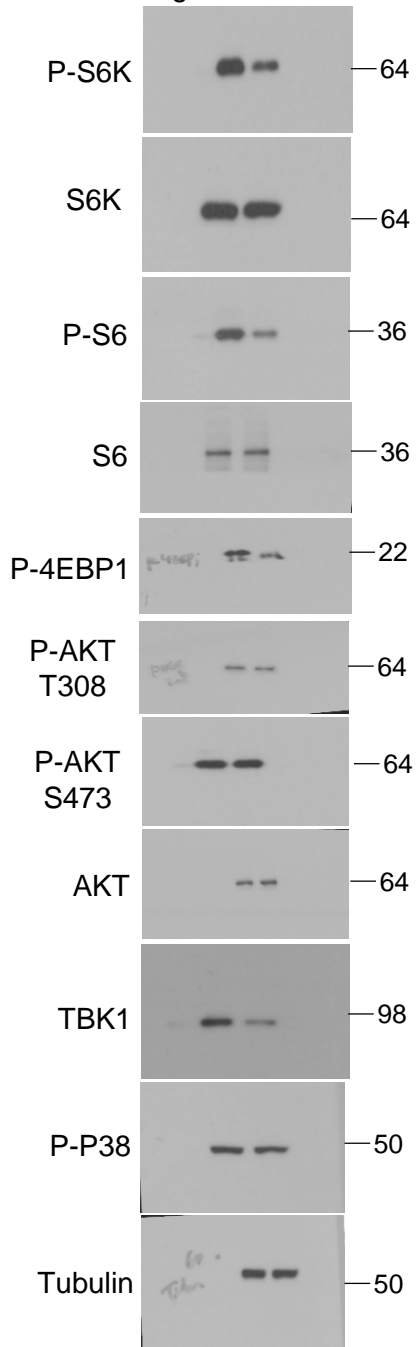

Fig.3b

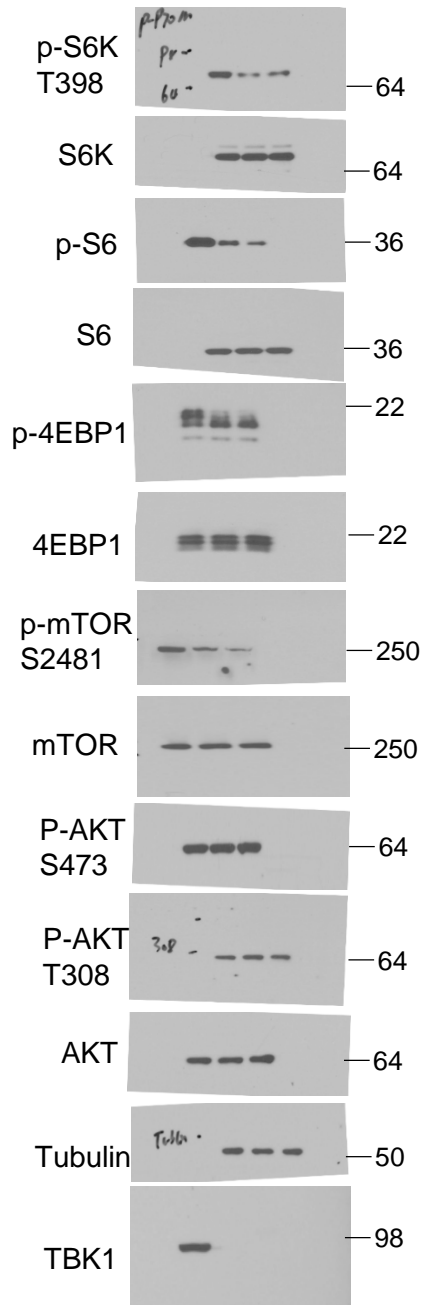

Fig.3c

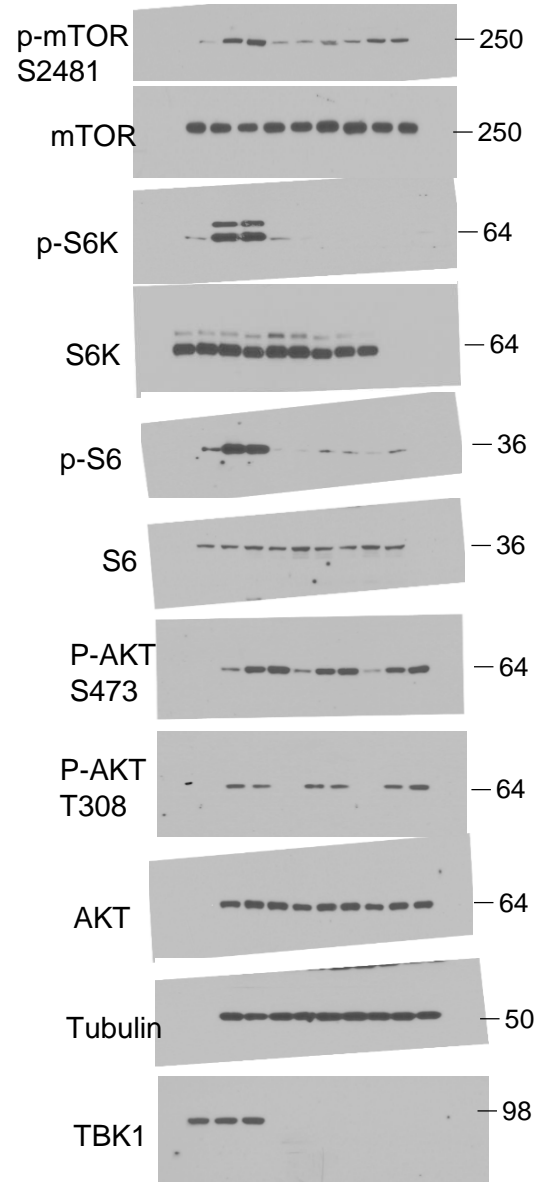

Fig.3d

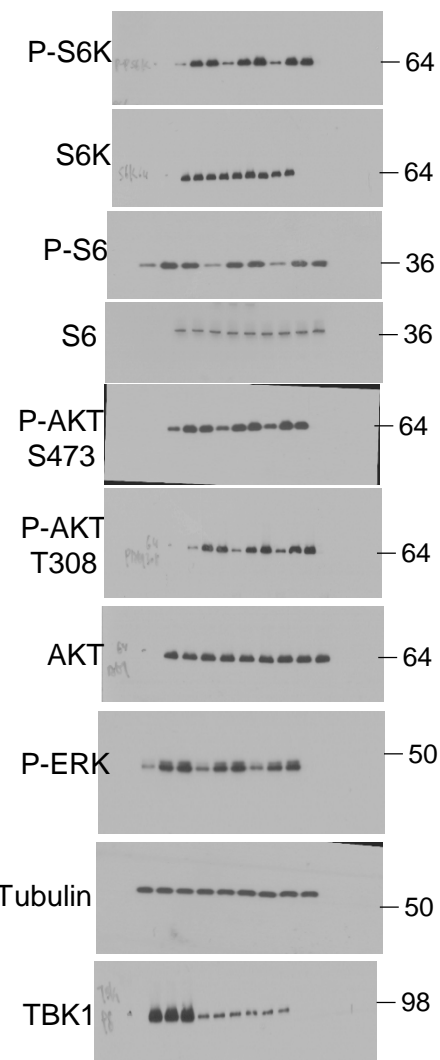

Fig.3e

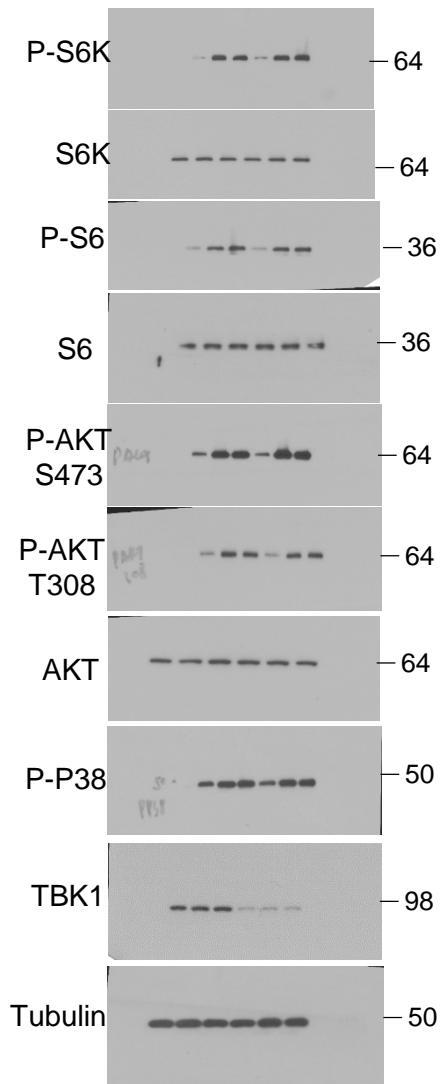

Fig.3f

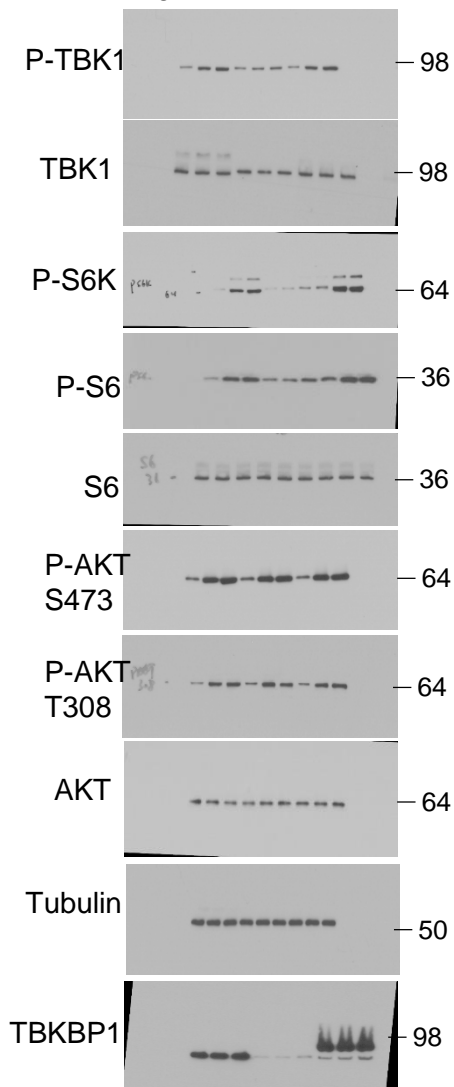

Fig.3g

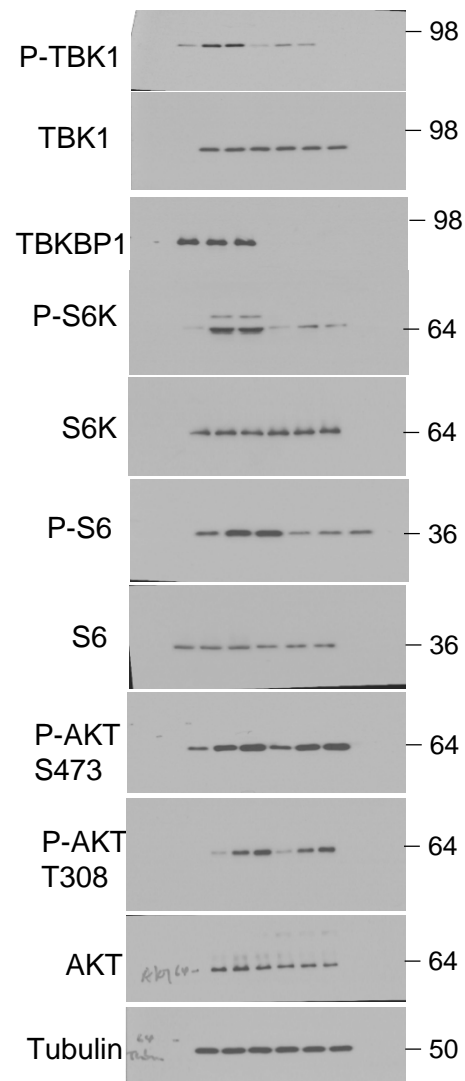

Supplement: NIHMS1541595-supplement-blot_fig3.pdf [file NIHMS1541595-supplement-blot_fig3.pdf]

Extended Data Fig. 4c

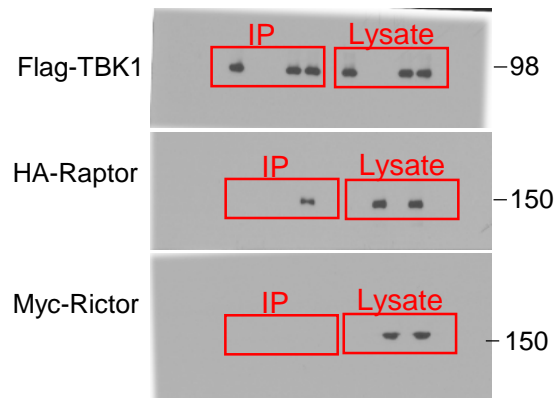

Extended Data Fig. 4f

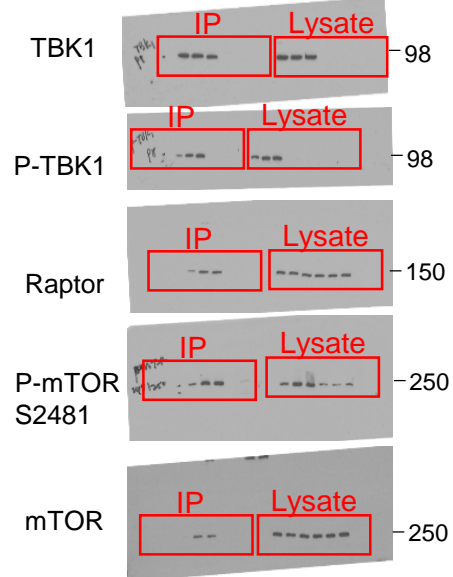

Extended Data Fig. 4d

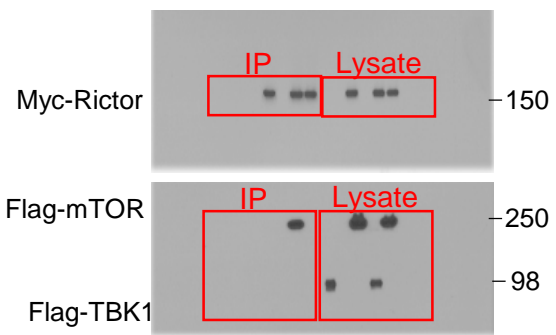

Extended Data Fig. 4g

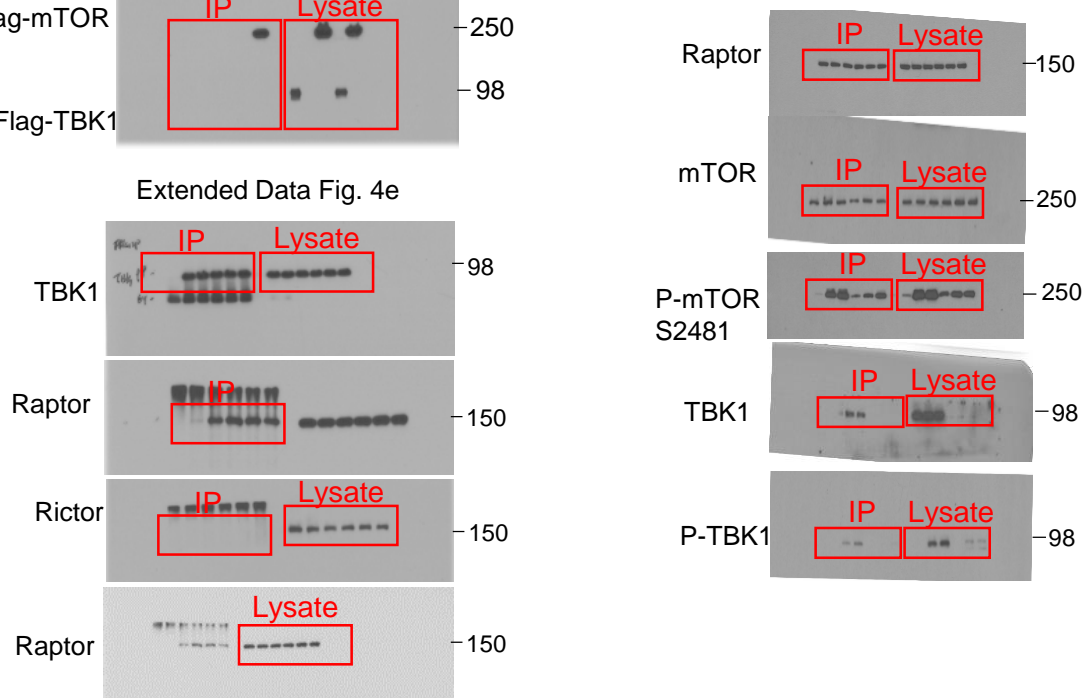

Supplement: NIHMS1541595-supplement-blot_fig4.pdf [file NIHMS1541595-supplement-blot_fig4.pdf]

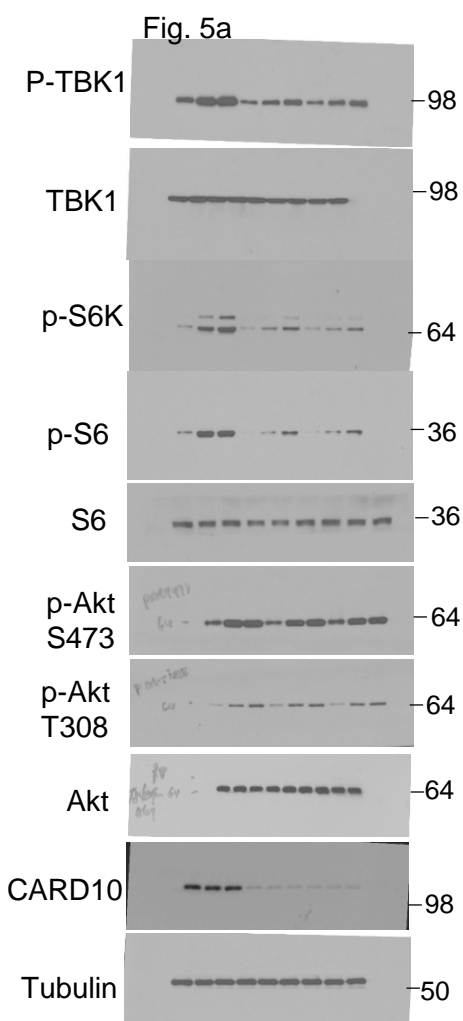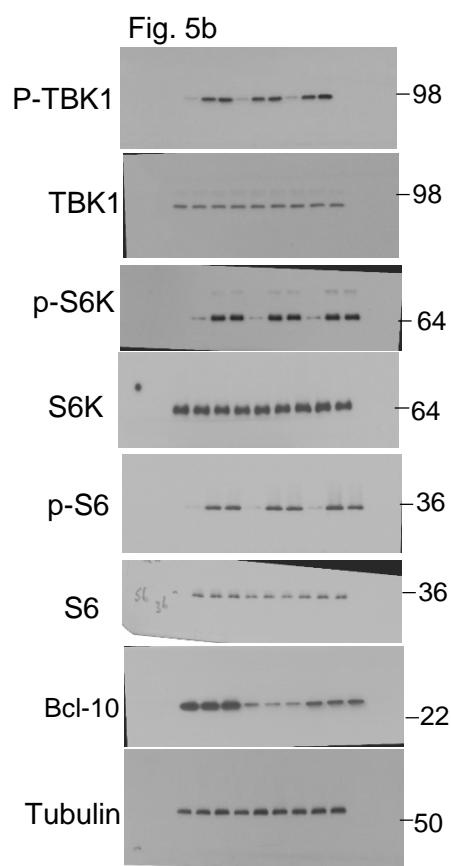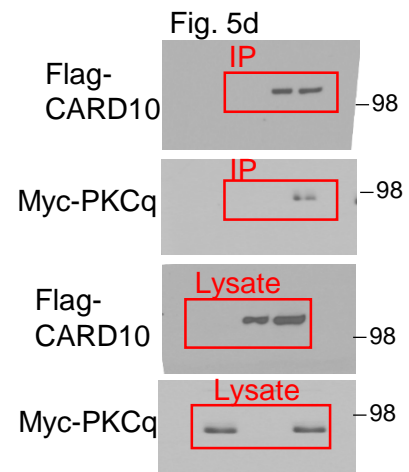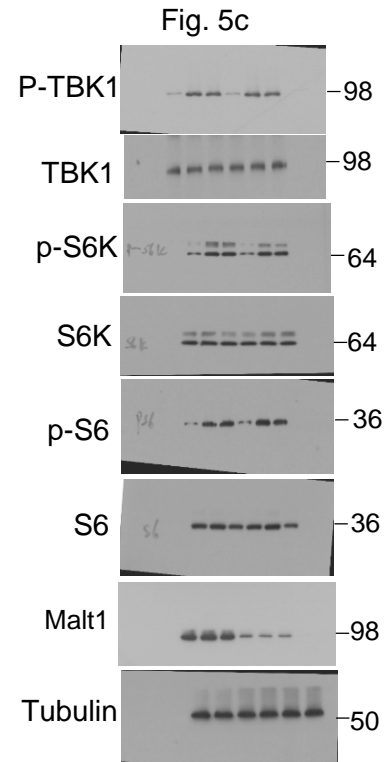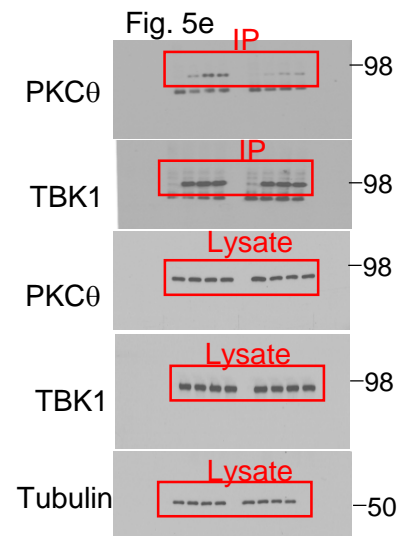

Fig. 5f

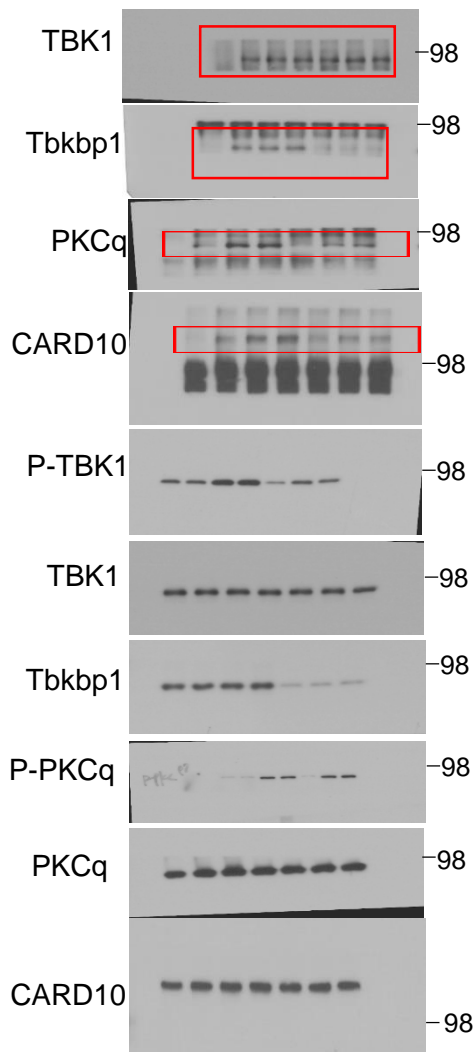

Fig. 5g

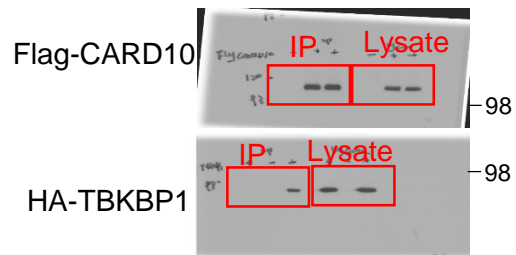

Fig. 5h

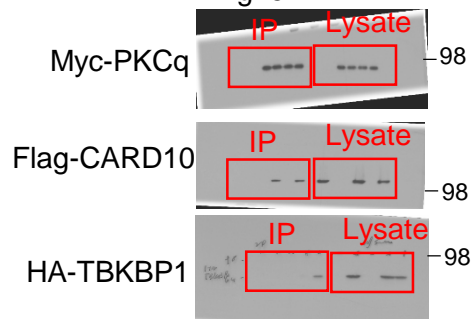

Fig. 5i

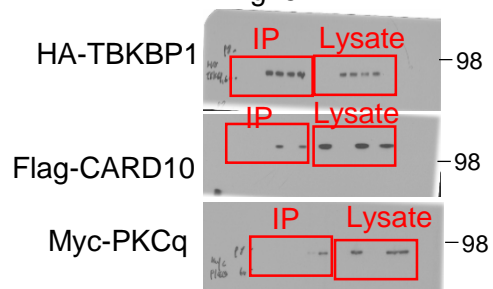

Fig. 5j

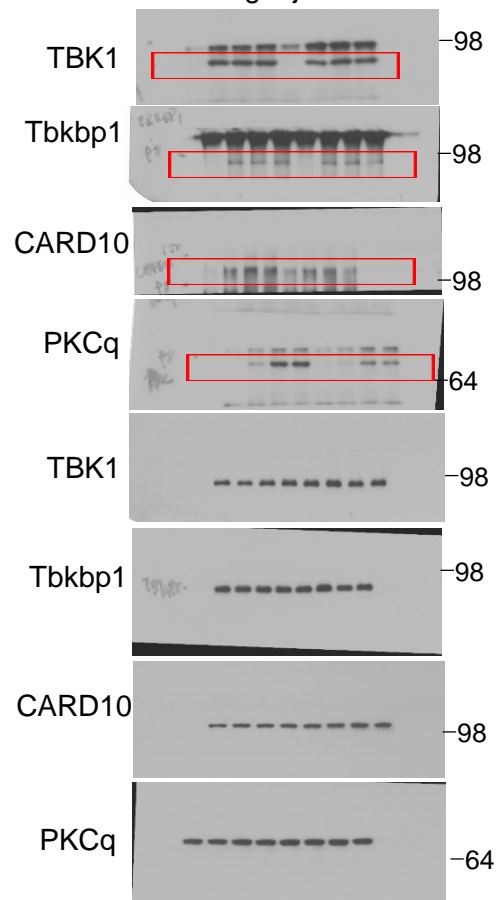

Supplement: NIHMS1541595-supplement-blot_fig5.pdf [file NIHMS1541595-supplement-blot_fig5.pdf]

Fig. 6h

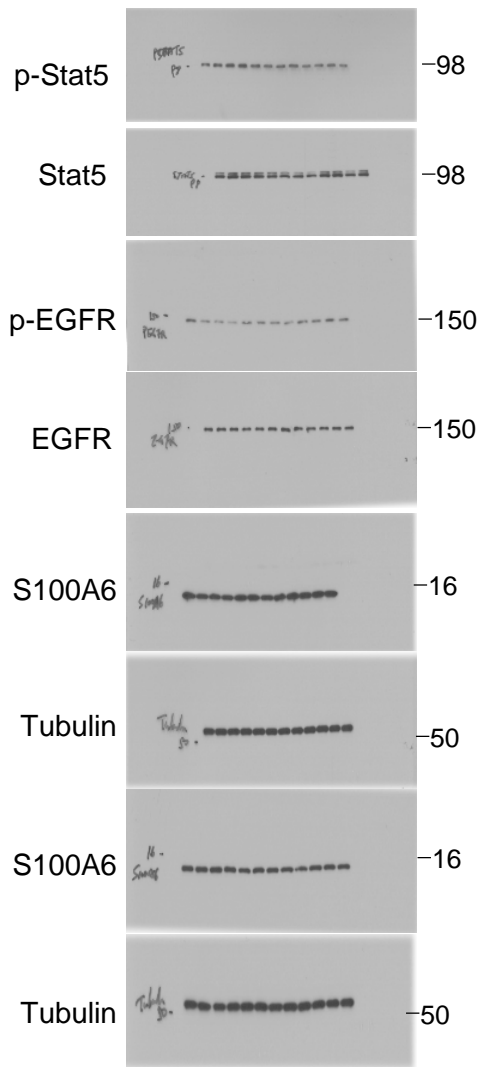

Supplement: NIHMS1541595-supplement-blot_fig6.pdf [file NIHMS1541595-supplement-blot_fig6.pdf]

Fig. 7m

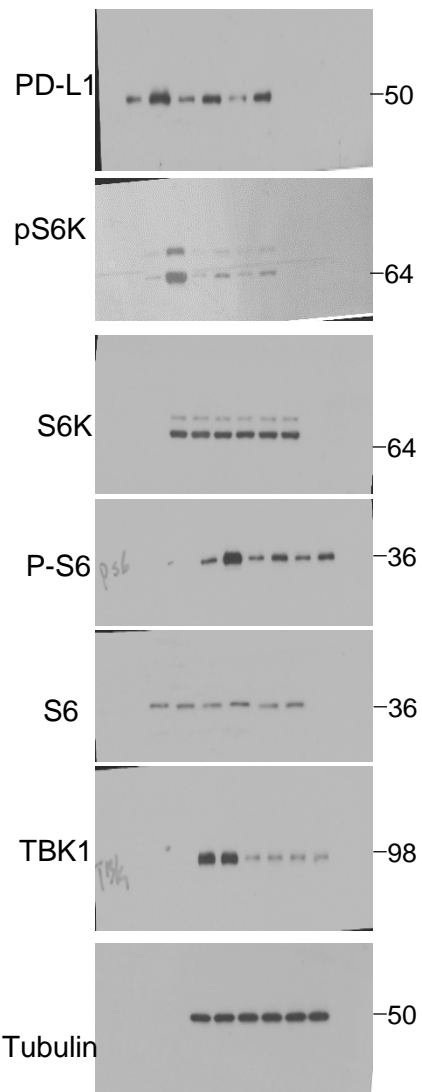

Fig. 7n

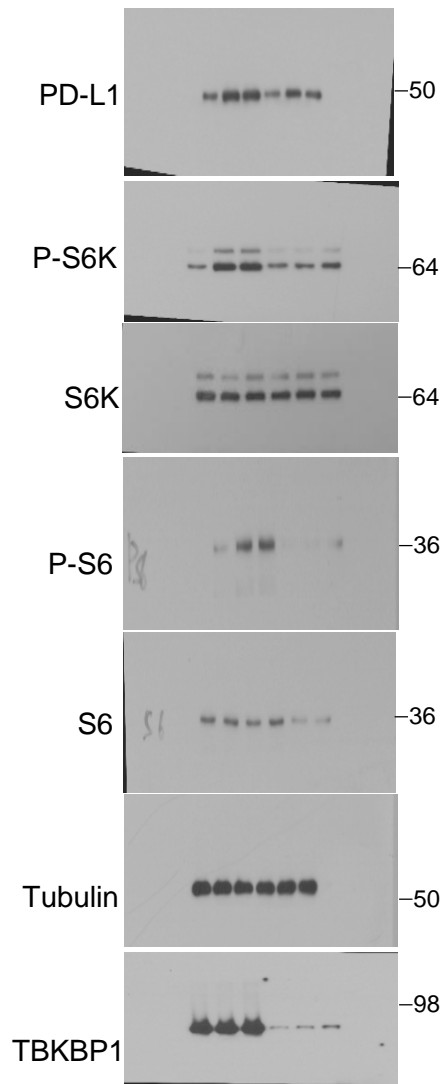

Supplement: NIHMS1541595-supplement-blot_fig7.pdf [file NIHMS1541595-supplement-blot_fig7.pdf]
